# Supplementary material
Source: PubMed Central journal article supplement (PMC10964991)

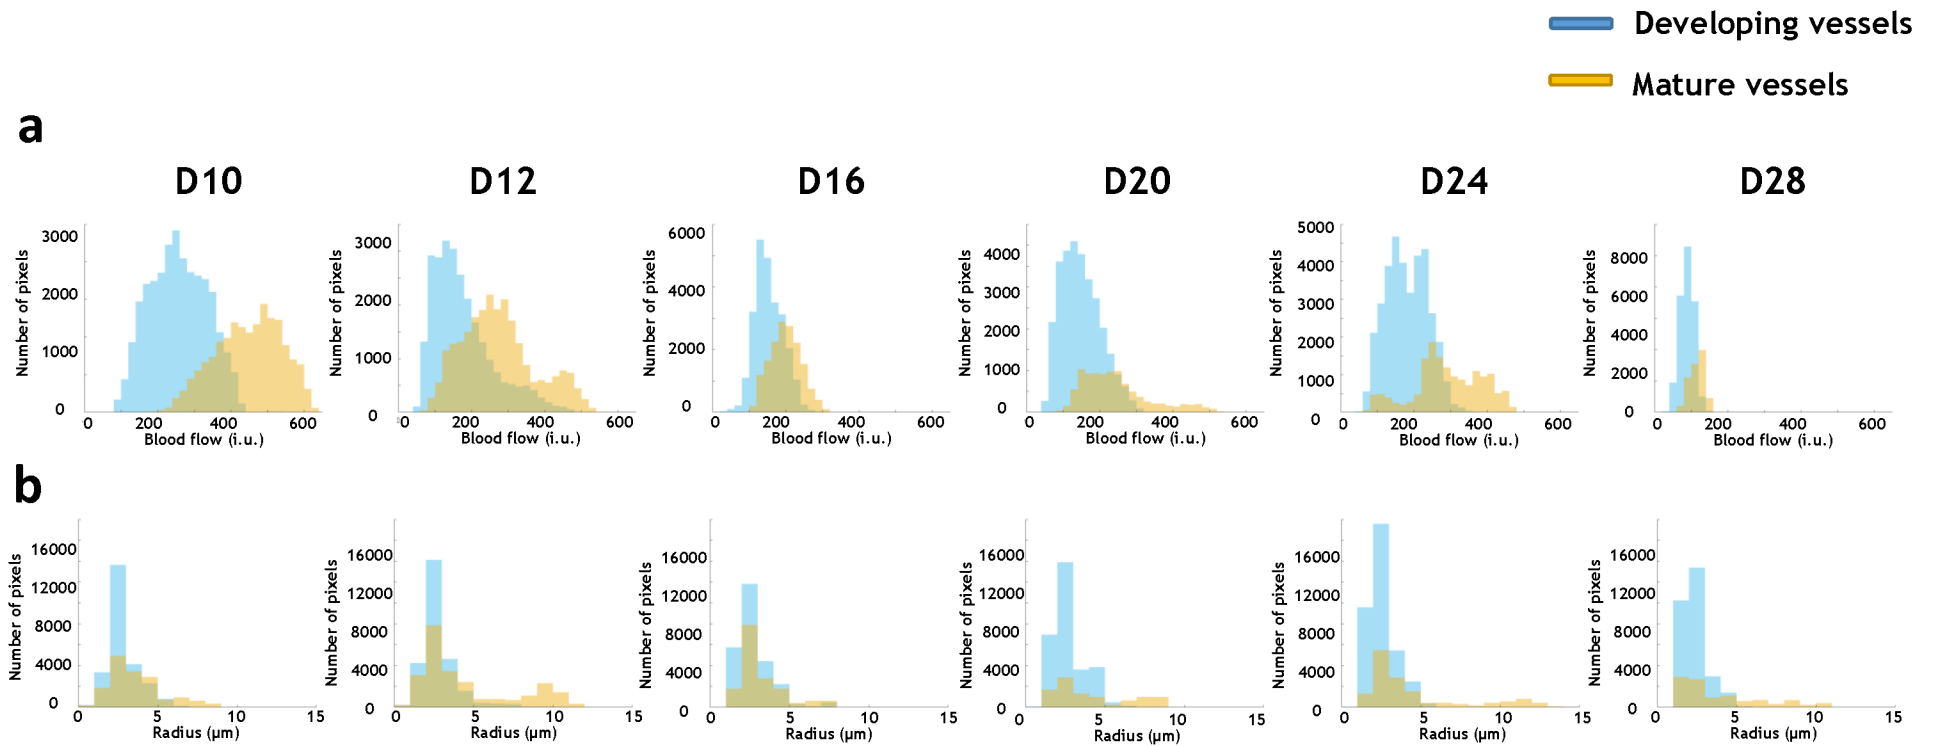

Suppl Fig. 1

**C**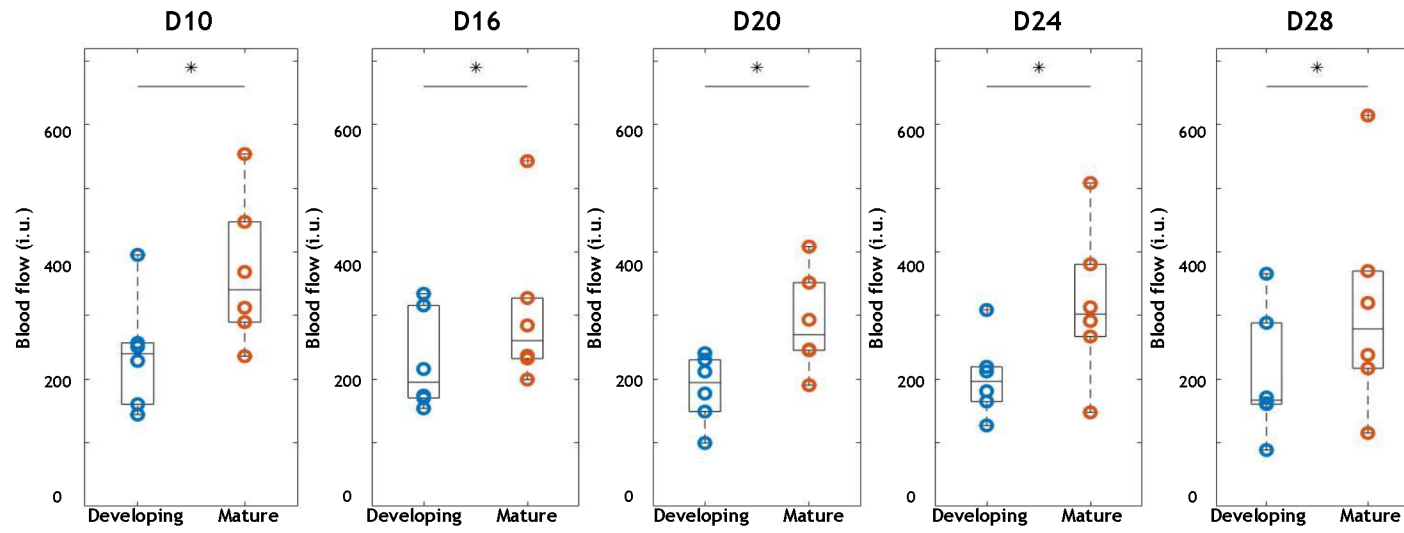**d**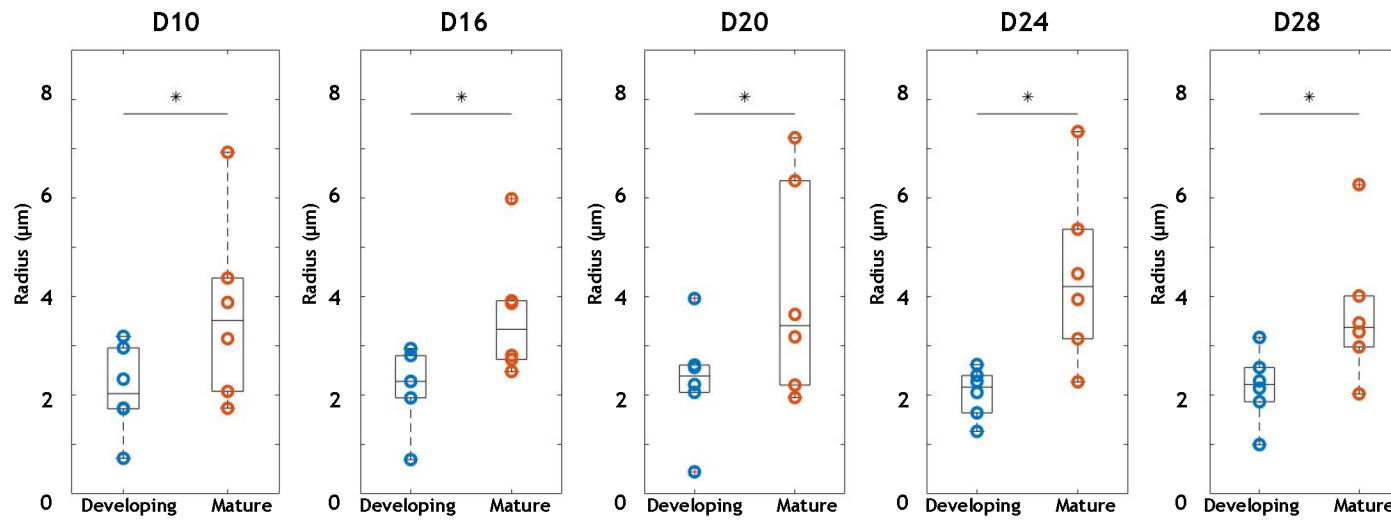**Suppl Fig. 1 Cont.**

Supplement: NIHMS1969252-supplement-Suppl_Fig_1.pdf [file NIHMS1969252-supplement-Suppl_Fig_1.pdf]
